# Supplementary material
Source: ML conference proceedings conference paper supplement (https://openaccess.thecvf.com/content/CVPR2021/html/Liu_Towards_Unified_Surgical_CVPR_2021_paper.html)
Supplement: Supplementary file 2 [file Liu_Towards_Unified_Surgical_CVPR_2021_supplemental.zip]

# Supplementary Material

Daochang Liu<sup>1,3,5</sup>, Qiyue Li<sup>1</sup>, Tingting Jiang<sup>1</sup>, Yizhou Wang<sup>1,4</sup>, Rulin Miao<sup>2</sup>, Fei Shan<sup>2</sup>, Ziyu Li<sup>2</sup>

<sup>1</sup>NELVT, Department of Computer Science, Peking University

<sup>2</sup>Peking University Cancer Hospital, <sup>3</sup>Deepwise AI Lab

<sup>4</sup>Center on Frontiers of Computing Studies, Peking University

<sup>5</sup>Advanced Institute of Information Technology, Peking University

{daochang, liqiyue, ttjiang}@pku.edu.cn

## 1. Dataset Details

Detailed skill metrics are listed in Table 1. The skill metrics and the skill proxy are annotated on a Likert scale from 1 to 5. A higher score means a better skill.

Table 2 lists all the 41 event classes, which include 13 procedural events at a large granularity, 13 procedural events at a small granularity, 8 adverse events, 2 repair events, and 5 video events. The 13 large-granularity procedural events, the “Bleeding” from the adverse events, and the “Camera out” from the video events are used for skill assessment in this study.

## 2. Contrastive Learning Details

The temporal neighborhood  $\mathcal{N}$  in the contrastive loss is set as 80 time steps with stride 10 on the simulated dataset, and 800 time steps with stride 50 on the clinical dataset.

The contrastive learning is used in the tool and event paths in our framework. The contrastive learning is disabled in the proxy path since its encoding function is set as an identity function. The contrastive learning is disabled in the visual path due to the intrinsic uncertainty in the visual features in the future. We empirically find that predicting visual features in the future could occupy too much model

| <i>Skill metrics</i>             |
|----------------------------------|
| Gentleness                       |
| Time and Motion                  |
| Instrument Handling              |
| Flow of Operation                |
| Tissue Exposure                  |
| Summary Technical Skill          |
| Summary Procedural Skill         |
| <i>Skill proxy</i>               |
| Clearness of the Operating Field |

Table 1. Detailed skill annotations on our dataset.

| <i>Procedural Events (Large Granularity)</i>          |     |
|-------------------------------------------------------|-----|
| Abdominal cavity exploration                          | 31  |
| Dissection of fusion tissue                           | 19  |
| Dissection of the greater omentum                     | 24  |
| LN dissection of subpyloric region (SR)               | 22  |
| LN dissection of hepatoduodenal ligament region (HLR) | 41  |
| LN dissection of the superior pancreas (SP)           | 27  |
| LN dissection of lesser curvature (LC)                | 21  |
| LN dissection of the left gastroepiploic region (LGR) | 22  |
| Resection of the distal stomach                       | 20  |
| Specimen removal                                      | 20  |
| Gastro-jejunal anastomosis                            | 21  |
| Jejuno-jejunal anastomosis                            | 21  |
| Irrigation and placement of the drains                | 17  |
| <i>Procedural Events (Small Granularity)</i>          |     |
| Trocar insertion                                      | 22  |
| Liver retraction                                      | 14  |
| Peritoneal washing cytology                           | 12  |
| Peritoneal lesion biopsy                              | 2   |
| Ligation of the right gastroepiploic vein             | 19  |
| Ligation of the right gastroepiploic artery           | 19  |
| Ligation of the subpyloric vessel                     | 11  |
| Resection of the duodenum                             | 20  |
| Ligation of the right gastric vessel                  | 19  |
| Ligation of the left gastric vein                     | 19  |
| Ligation of the left gastric artery                   | 20  |
| Ligation of the posterior gastric vein                | 9   |
| Ligation of the left gastroepiploic vein              | 18  |
| <i>Adverse Events</i>                                 |     |
| Bleeding                                              | 279 |
| Rupture/tear of tissue                                | 2   |
| Tear of spleen capsule                                | 4   |
| Injury/tear of serosa                                 | 8   |
| Wrong anatomy plane                                   | 3   |
| Perforation of the bowel                              | 1   |
| Adjoined organ injury                                 | 7   |
| Insufficient pneumoperitoneum pressure                | 1   |
| <i>Repair Events</i>                                  |     |
| Repair                                                | 9   |
| Hemostasis                                            | 201 |
| <i>Video Events</i>                                   |     |
| Camera out                                            | 352 |
| Blurred view                                          | 128 |
| Video exception (black screen, flip, etc.)            | 21  |
| Software interface                                    | 12  |
| Overlong idle time                                    | 27  |

Table 2. All the surgical events annotated on our dataset and the numbers of event instances.

capacity and complicate model convergence.

| Method ↓        | SU    | NP    | KT    | Avg.  |
|-----------------|-------|-------|-------|-------|
| Ours (VTP) 5FPS | 0.791 | 0.761 | 0.784 | 0.779 |
| Ours (VTP) 2FPS | 0.715 | 0.760 | 0.792 | 0.757 |

Table 3. Impact of FPS on the simulated dataset (4-FOLD).

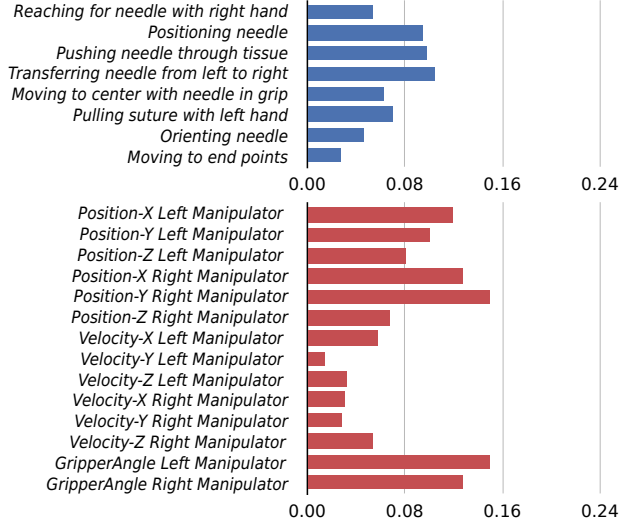

Figure 1. Blue: Correlations between model outputs and surgical gestures on the simulated needle-passing ( $R_E$ ). Red: Correlations between model outputs and tool features on the simulated needle-passing ( $R_T$ ).

### 3. Impact of FPS

The performance of our framework on the simulated dataset with the FPS reduced from 5 FPS to 2 FPS is reported in Table 3. It is shown that our framework is robust to a lower FPS.

### 4. $R_E$ and $R_T$ on the Simulated Needle-Passing and Knot-Tying Tasks

Correlations between model outputs and input features ( $R_E$  and  $R_T$ ) on the simulated needle-passing task are plotted in Fig. 1. On this task, correlations are relatively lower than on the suturing task in the main paper. For  $R_T$ , it is observed that the position features and gripper angles have higher correlations than the velocity features.

Correlations between model outputs and input features ( $R_E$  and  $R_T$ ) on the simulated knot-tying task are plotted in Fig. 2. For  $R_E$ , the gesture “Reaching for needle with left hand” has the highest correlation. For  $R_T$ , the position features have higher correlations than others.

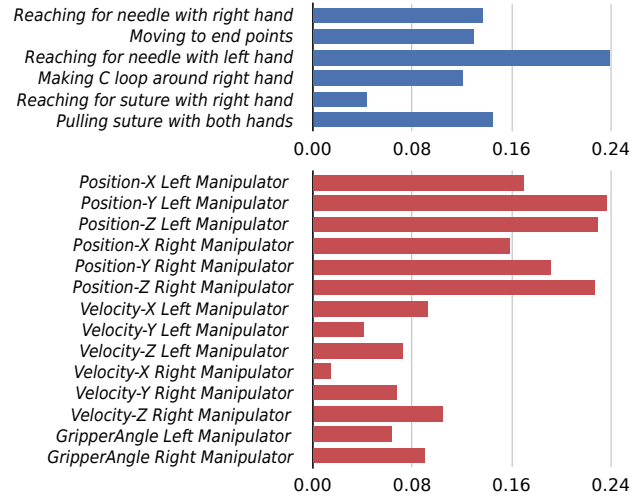

Figure 2. Blue: Correlations between model outputs and surgical gestures on the simulated knot-tying ( $R_E$ ). Red: Correlations between model outputs and tool features on the simulated knot-tying ( $R_T$ ).
